# Supplementary material for: Assessment of land use impact on hydraulic threshold conditions for gully head cut initiation
Source: Copernicus journal article supplement (doi:10.5194/hess-2015-462), 2016-01-18
Supplement: Supplementary file [file hess-2015-462-AC3-supplement.pdf]

1 **Assessment of land use impact on hydraulic threshold conditions for gully head cut**  
2 **initiation**

3 Aliakbar Nazari Samani<sup>1</sup>, Qiuwen Chen<sup>2,3,\*</sup>, Shahram Khalighi<sup>1,3</sup>, Robert James Wasson<sup>4</sup>

4 Mohammad Reza Rahdari<sup>1</sup>

5 1. Faculty of Natural Resources, University of Tehran, Karaj, Iran

6 2. CEER Nanjing Hydraulics Research Institute, Nanjing, 210023, China

7 3. RCEES Chinese Academy of Sciences, Beijing, 100085, China

8 4. Professor, Senior Research Fellow, Institute of Water Policy, National University of  
9 Singapore, Singapore.

10 \* Correspondence to: Tel./Fax: +86 10 62849326, E-mail: [qwchen@nhri.cn](mailto:qwchen@nhri.cn)

11 **Abstract:** Gully as accelerated erosion process is responsible for land degradation under  
12 various environmental conditions and has been known as a threshold phenomenon. Although  
13 the effects of gully processes have been well documented, less soil erosion models have  
14 taken into account the threshold condition necessary for gully development. This research  
15 was devoted to determine the effects of land use change on hydraulic threshold condition  
16 and stream power of water flow through an in-situ experimental flume (15m\*0.4m). Results  
17 indicated that head cut initiation and detachment rates showed a better correlation to stream  
18 power indices than shear stress ( $\tau_{cr}$ ). The threshold unit stream power value ( $\omega_u$ ) for head cut  
19 initiation in rangeland, abandoned and dry farming were 0.0276, 0.0149 and  $4.5 \cdot 10^{-5}$  m/s,  
20 respectively. Moreover, the micro relief condition of soil surface and surface vegetation  
21 affected the flow regime of discharge and velocity. It is seen that the composite hydraulic  
22 criteria of Froude number ( $Fr$ ) and discharge ( $Q$ ) can clearly discriminate the land uses'  
23 threshold. In fact, the remarkable decrease of  $\tau_{cr}$  in dry farming was related to the effect of  
24 tillage practice on soil susceptibility and aggregate strength. The findings indicated that  
25 using the unit steam power index instead of critical shear stress could increase the models  
26 precision for prediction of head cut development. Compared to EGEM's equation for critical  
27 shear stress, it is important to point out that for modelling of gully erosion, using of single  
28 soil attributes can lead an inaccurate estimation for  $\tau_{cr}$ . In addition, based on the findings of  
29 this research, the use of threshold value of  $\tau_{cr}= 35$  dyne/cm<sup>2</sup> and  $\omega_u=0.4$  Cm/S in physically  
30 based soil erosion models is susceptible to high uncertainty when assessing gully erosion.

31 **Keywords:** Gully erosion; head cut; stream power; threshold; land cover

## 32 **1 Introduction**

33 Gully erosion as an accelerated erosion phenomena has been known as most effective  
34 features in most landscapes. Nonlinear dynamics and complexity of gully erosion have  
35 attracted great interests. Researchers have tried to establish different benchmarks to separate  
36 gullies from other concentrated water erosion features such as rills and streams. Critical  
37 cross-sectional area (Hauge, 1977) introduced a minimum width of 0.3 m and depth of 0.5 m  
38 (Brice, 1966) as a criterion to distinguish rill from gully (Imenson and Kwaad 1980).  
39 Although the transition from rill to gully erosion is a continuum process, Torri et al. (1987)  
40 and Bryon and Slattery (1992) went a step further and suggested a hydraulic concept for rill  
41 and gully formation.

42 In fact the most proportion of sediment yield in a catchment scale is produced by gullies in a  
43 wide range of environmental conditions, as described by Nazari Samani et al. (2011) in Iran,  
44 Wasson et al. (1996) and Poesen et al. (2003) in Europe, and Li et al. (2003) in China.  
45 Many soil erosion models have tried to consider sheet and rill processes; however, fewer  
46 attempts have been made to take into account gully erosion at the catchment scale.

47 Gullying process is an erosion phenomenon, which can develop as soon as the determinant  
48 factors (e.g overland flow and rainfall erosivity) exceed a threshold value or resistance force  
49 (soil or vegetation) decreases to the critical point. The erosivity of runoff can be defined by  
50 hydraulic criteria such as boundary stream power, threshold velocity or shear stress. The  
51 required threshold force value to create channel-head incision into the soil surface is mainly a  
52 function of soil and land use attributes. In addition, detailed investigation into the relationship  
53 between the topographic threshold and shear stress indicated that upslope catchment area and  
54 surface slope gradient are linked to stream power index and critical shear stress (Begin and  
55 Schumm, 1979). The potential of water flow for erosion can be obtained by combining  
56 hydraulic and topographic characteristics (Begin and Schumm, 1979; Conforti et al., 2011).

57 Although the effects of land use on topographic threshold have been investigated  
58 (Vandekcheknov et al., 2000; Poesen et al., 2003; Nazari Samani et al., 2009), there is still  
59 great demand to understand head cut initiation and determine threshold hydraulic values  
60 when establishing a fundamental knowledge for soil erosion and developing a process  
61 oriented gully erosion model. The key question is how large should  $\tau_{cr}$  be in order to initiate a  
62 gully head cut? This question can be further derived as two criteria, namely shear stress and  
63 stream power.

64 Some researchers have investigated the hydraulic threshold of head cut initiation: Prosser et  
65 al. (1995, 2000) in the grassland near San Francisco, Nachtergaele and Poesen (2002) in the  
66 Belgian loess belt, and Adelpour (2004) in loamy-sands in Iran. However they suggested that  
67 more field-based experiments are necessary to effectively analyse effects of land use changes  
68 on the threshold situation of head cut initiation. In addition, most physically based erosion  
69 models such as WEPP, CREAMS and PRORILL are based on the simplified transport  
70 capacity equation Yalin (1977) and soil detachment rate as well as shear stress (Zhang et al.,  
71 2014). These models predict the soil erosion through rill and inter-rill concept while neglect  
72 gully erosion distribution along a catchment. Meanwhile, it is essential to study the hydraulic  
73 thresholds under different environmental conditions and land use patterns when establish a  
74 worldwide model for comprehensive erosion predication.

75 This objectives of this study were to: (1) understand the land use effects on head cut initiation;  
76 (2) reveal the relationship between head cut detachment and hydraulic threshold indices  
77 (stream power and shear stress); and (3) identify the most determinant factor for gully and  
78 concentrated flow erosion.

## 79 **2 Materials and methods**

### 80 **2.1 Experiment design**

81 The experiments were conducted in the Samal area located in the Dareh-Kore watershed of

82 Boushehr province in south of Iran. The region has a typical arid to semi-arid climate with an  
83 average annual temperature of 14 °C and an average annual rainfall of 200 mm. The main  
84 lithological formations include the Miocene Fars Group (Aghajari, Mishigan; consisting of  
85 marl, shale, marly and shaly limestone) in the uplands and Quaternary alluvium (consisting of  
86 gravels, sands, silt and clay) in the piedmont plain. Gully erosion and bad land formation are  
87 two highly destructive processes impacting on the hilly and lowland areas, and are common  
88 on the Quaternary formations with slope gradients of less than 20%.

89 The flume experiments were conducted using an erosion plot that was 15 m long and 0.4 m  
90 wide and 0.5 m high, designed to create non-uniform flow resistance. The ground surface  
91 cover of the soil was not disturbed. For each experiment, the parameters of hydraulic flow  
92 were measured over the 9 m reach in the middle of the flume (Fig. 1 and 2). Three land uses,  
93 dry farming, rangeland and abandoned areas, were chosen. In addition, in order to prevent the  
94 effects of spatial variation of soil properties, all tests were conducted at a site consisting of  
95 three land uses. The distance between test locations was about 200 m. The soil attributes  
96 according to the land use are presented in Table 1, which show that no significant difference  
97 was found between the soil attributes, although a small variation in the samples could be seen  
98 in the Ca, organic matter and Na. However, slope could not be held constant. The maximum  
99 soil surface slope was in the rangeland (5.9%), while the dry farming land had the least  
100 surface slope (0.13%). Therefore, in order to determine the effect of land slope, the shear  
101 stress index was used. This index considers both discharge and energy characteristics, which  
102 are explained further in the following section. The characteristics of the land cover in the  
103 experimental sites were as follows:

104 a. Rangelands: No surface gravel and uniform cover of lichens and mosses (Fig. 1), with  
105 grasses (5%) of *St.cap*, *St.ar*, and low litter (1%).

- 106 b. Dry farming: Ground cover of annual grasses (*Ho. Sp.*; *Br. tec.*), forbs (40%) (*Ch. Ab.*,  
107 *As. Sp.*) and residuals of stalks from previous years and no surface gravel. In contrast  
108 to rangelands, the canopy cover of the dry farming land is much greater because of  
109 agriculture operations and low slope as well as establishment of weeds.
- 110 c. Abandoned areas: This land had been relinquished for 7 years. Vegetation cover of 50%  
111 includes annual grasses (*Agi. sp*, *Ma. Sp*, *Fu. sp*, *Br. tec.*) and forbs, low gravel cover  
112 (1%) and litter (3%).

113 [Fig. 1 is here]

114 [Fig. 2 is here]

115 [Table 1 is here]

## 116 **2.2 Experimental operation, measurement and parameter calculation**

117 The flume's sidewalls were beaten into the soil and sealed with plaster, cement and soil to  
118 prevent leakage and incursions by animals. To determine the slope of the longitudinal profile  
119 with high precision, ground surveying was performed using a Theodolite camera, levelling  
120 rod and measuring tape. After setting up the water supply equipment including a water tank,  
121 stilling basin and Parshall flume at both ends of the plot, the surface of flume was wetted  
122 carefully by a hand sprinkler. The experiment was started with very low discharge (0.75 l/s),  
123 and after each run, the discharge was increased. The total number of experiments in dry  
124 farming, abandoned and rangeland were seven, five and four respectively. The numbers of  
125 runs were different because head cut initiation on different land uses was not similar, and the  
126 tests were continued until the threshold condition is reached.

127 The experiments were done under a steady condition, saying that the discharge was constant  
128 in each replicate, and in the consecutive test the discharge was increased. The input discharge  
129 was controlled to be constant by a series of pond and storage and a small spill way. The water  
130 supply and discharge controller pond were placed at the beginning of inlet before water

131 flowing into Parshall flume.

132 For every test, the flow parameters including discharge, depth of flow (by a steel ruler) and  
133 sediment samples (at the end of the flume) were measured directly, while the water surface  
134 velocity was determined by liquid dye tracers (injected once). The soil surface of plots were  
135 delaminated and monitored by photos. Any ditch or step like incised erosion feature with size  
136 over 3\*3 cm was considered as a head cut generation. The experiments were implemented  
137 step by step, and after each run the flume was examined for head cut initiation. Through such  
138 procedure, the head cut initiation and development could be observed.

139 The following relations were used to calculate the hydraulic characteristics of flow.

140 Mean flow velocity:  $V = \frac{Q}{A}$  (1)

141 Shear stress of flow:  $\tau = \gamma RS$  (2)

142 Stream power:  $\omega = \tau V = \rho g d S V$  (3)

143 Total stream power:  $\omega_T = \rho g Q S$  (4)

144 Unit stream power:  $\omega_u = S V$  (5)

145 The soil detachment rate:  $D_r = \frac{C_v \cdot Q \cdot t}{6}$  (6)

146 where  $Q$  is Discharge ( $\text{m}^3/\text{s}$ ),  $A$  is cross section area of flow ( $\text{m}^2$ );  $V$  is flow velocity ( $\text{m}/\text{s}$ );  $d$   
147 is flow depth ( $\text{m}$ );  $\nu$ : kinematic viscosity ( $\nu = 0.01 \text{ cm}^2/\text{s}$ );  $g$  is gravitational acceleration  
148 ( $\text{m}/\text{s}^2$ );  $\gamma$  is specific gravity ( $\rho g$ );  $S$  is water surface slope;  $R$  is hydraulic radius ( $\text{m}$ );  $C_v$  is  
149 sediment weight concentration ( $\text{kg}/\text{m}^3$ );  $t$  is run time ( $\text{s}$ ). The flow regime was determined  
150 based on Froude number equation ( $F_r$ ).

151 The basic assumption for this experiment is: the detachment and head cut initiation by water  
152 flow occurs when the runoff energy is as large as the soil particle resistance. The validity and  
153 generality of this assumption have been verified by previous studies (Yang, 1996; Knapen et  
154 al., 2007). Threshold value was calculated by fitting the line of  $D_r$  to stream power  $\omega$  through

155 the equation (7).

$$156 \quad D_r = K_c \omega + b \quad (7)$$

157 where  $D_r$  is the detachment rate of flow ( $\text{kg m}^{-2} \text{s}^{-1}$ );  $\omega$  is stream power (Eq. 3-6). The  $K_c$  and  
158  $b$  are the regression parameters.

159 To find the effect of land use on flow characteristic condition, the measured detachment rates  
160 ( $D_r$ ) from experimental tests were plotted versus hydraulic indices ( $\omega_u$ ,  $\omega_T$ ,  $\omega$  and  $\tau$ ).  
161 According to the slope of fitted lines, the effects of land use on water flow were assessed.

162 To compare the findings with a gully erosion model, the procedure of EGEM for critical  
163 hydraulic shear stress (Tekwa et al., 2015) was calculated based on equation (8).

$$164 \quad \tau_{cr} = 0.0065 * (\% \text{Clay} * 10^{0.0182}) \quad (8)$$

## 165 **3 Results**

### 166 **3.1 Effects of land use on stream power and flow type**

167 Results of calculated stream power and their relations to detachment rate ( $D_r$ ) of all land uses  
168 were shown in figure 3. The comparison of  $D_r$  indicated significant differences of sediment  
169 load between three land uses. The parameters of the regression lines (slope and intercept) did  
170 not follow the same trend in all land uses and indices. Dry farming land showed the smallest  
171 values of total stream power indices.; while rangeland and abandoned lands had smallest  
172 value of unit stream power ( $\omega_u$ ). Although all stream power indices could indicate erosion  
173 potentials, the  $\omega_u$  had the highest significant ( $p < 0.01$ ) values ( $R^2 = 0.99$ ) based on the  
174 coefficient of determination. However, the cloud of points for dry farming land exhibited a  
175 scattered pattern, which may be explained by the disturbance in agricultural lands.

176 The Froude Number ( $F_r$ ) varied from 0.05 to 5.1, and the head cut features developed under  
177 sub-critical to super critical conditions. The lowest  $F_r$  values for head cut initiation were  
178 1.61 (with  $Q = 9.2$  l/s) for rangeland and 0.1 (with  $Q = 8.2$  l/s) for dry farming land. The



179 discharge for both dry farming land and rangeland were similar, but the flow types were quite  
180 different due to soil disturbance in dry farming land. Therefore, it is expected that by  
181 coupling  $F_r$  value and flow rate, a composite parameters for head cut initiation could be more  
182 meaningful.

183 [Fig. 3 is here]

### 184 **3.2 Impact of land use on the threshold shear stress for surface erosion**

185 The results of the relationship between the detachment rate ( $D_r$ ) and the shear stress are  
186 shown in Figures 4, 5 and 6. We preferred to use dyne/cm<sup>2</sup> as the shear stress unit because of  
187 the small values obtained in units of Pa (1Pa=10 dyne/cm<sup>2</sup>). The significant relationships  
188 ( $P=0.05$ ) between  $D_r$  and shear stress were observed. The threshold shear stress for each land  
189 use was calculated based on the slopes and intercepts shown in Figures 4, 5 and 6. These  
190 values are 83, 11 and 74 dyne/cm<sup>2</sup> for rangelands, dry farming lands and abandoned areas  
191 respectively. Moreover, soil resistance to concentrated overland flow ( $K_c$ ) was obtained for  
192 rangeland (0.0038) and dry farming (0.1912). It is notable that the resistance of soil to  
193 concentrated flow in rangelands is more than 50 times that in dry farming land.

194 [Fig. 4 is here]

195 [Fig. 5 is here]

196 [Fig. 6 is here]

197 Through the Eq. 8, the critical shear stress  $\tau_{cr}$  for dry farming, rangeland and abandoned land  
198 were calculated to be 7.53, 6.43 and 8.40 DyneCm<sup>2</sup>, respectively. The differences between  
199 field data and EGEM were remarkably high. Such inconsistency revealed that the method of  
200 estimating  $\tau_{cr}$  based on single soil attribute could cause unreliable results.

### 201 **3.3 Effect of land use type on gully initiation threshold**

202 The numbers of head cuts corresponding to mean shear stress for each experiment were listed  
203 in Table 2. The critical shear stress for head cut initiation was 174 dyne/cm<sup>2</sup> in rangeland, 35

204 dyne/cm<sup>2</sup> in dry farming, and 153 dyne/cm<sup>2</sup> in abandoned land. The 3-4 fold difference  
205 between the calculated critical shear stresses in the three studied land uses could be linked to  
206 the soil surface condition. Although the vegetation cover of rangeland was less than that of  
207 dry farming, the biological crust of lichens and mosses made the soil very resistant to  
208 detachment. In fact, the presence of biological crusts on the surface of the soil in the  
209 rangeland increased the surface soil resistance several-fold (Table 2, Fig. 4 and 5). Table 2  
210 demonstrates that the number of head cuts increased with shear stress. For example, from run  
211 3 to run 5 in abandoned land, the number of head cuts increased more than two-fold while the  
212 average shear stress increased just 1.3 times.

213 [Table 2 is here]

214 From Table 2 and Fig. 6, it can be found that the relationship between head cuts and shear  
215 stress of abandoned land was similar to the dry farming lands, although the critical shear  
216 stress for head cut initiation of abandoned land (153 dyne/cm<sup>2</sup>) was close to that of rangeland  
217 (174 dyne/cm<sup>2</sup>).

#### 218 **4 Discussion**

219 From the study, it was found that for the rangeland with no disturbance on soil and cover,  
220 both detachment and gully head initiated within a sub-critical flow regime. The threshold  
221 value of  $F_r$  varied from 0.65 to 1.10. This variation is confirmed by other studies that reported  
222 the  $F_r$  number in the range of 0.5 - 2.8 as a threshold value for water flow incision (Knapen et  
223 al., 2006; Adelpour, 2004; Prosser et al., 1995). One possible explanation to the development  
224 of head cut under low  $F_r$  number in dry farming land might be the high ground vegetation and  
225 micro relief roughness. However, tillage operations and soil disturbances significantly  
226 increased the instability and erodibility of soil aggregates; consequently, flow detached and  
227 entrained soil particles more easily, which led to the creation of head cuts. Despite  
228 sub-critical flow in abandoned and dry farming lands, the detachment rate was more than

229 twice that of rangeland. This could be attributed to the decrease in aggregate resistance  
230 produced by tillage operations (Knapen *et al.*, 2007).

231 Flow discharge and  $F_r$  can be used as a composite parameter for discriminant of surface  
232 erosion and head cut initiation. The values of this composite parameter ( $Q^*F_r$ ) were 14.81,  
233 0.81 and 2.58 for rangeland, abandoned and dry farming land respectively. It can be seen that  
234 the composite parameter could clearly rank the flow energy of the three land uses. Therefore,  
235 in arid and semi-arid regions with sparse and low vegetation cover, any decreasing of  
236 vegetation cover could strongly affect the surface roughness and flow regime, and  
237 consequently the soil detachment and erosion (Léonard and Richard, 2004). This finding  
238 indicated that the effects of land disturbances and land cover changes on hydraulic threshold  
239 of soil detachment and gully erosion were significant, which may not be resilient in a short  
240 time scale.

241 The threshold values for unit stream power ( $\omega_u$ ) were 0.0276, 0.0149 and  $4.48 \times 10^{-5}$  m/S for  
242 rangeland, abandoned and dry farming respectively. The 100 fold differences could be  
243 attributed to the land use effects on water flow energy and the tillage operation effects on soil  
244 erodibility. In EUROSEM model, the  $\omega_u$  was assumed to be 0.4 Cm/S, which is not consistent  
245 to our findings. The scattered pattern for dry farming land indicated that when detachment  
246 rate was higher than  $1(\text{kg}/\text{m}^2/\text{S})$ , the model prediction was not accurate enough (Fig 3).

247 The relationship between average shear stress, contributory catchment area and slope  
248 proposed by Begin and Schumm (1979) showed the role of a geomorphic threshold on shear  
249 stress. Based on the relationship, it is seen that as  $\tau_{cr}$  increases, upslope area and slope  
250 gradient must increase in order to initiate a gully. Nazari *et al.* (2009) reported that in this  
251 study area, when land use changed from rangeland to dry farming land, the areas susceptible  
252 to gullying increased by a factor of two, from 6% to 12% of the total area. Therefore, land  
253 use changes not only affected soil stability but also decreased the geomorphic threshold,

254 causing more areas prone to gullyng.

255 In addition, the impacts of tillage operations on the aggregate attributes such as degree of  
256 consolidation, soil weathering, dry and wetness, can affect the erodibility parameter  $K_r$ ,  
257 (Franti *et al.*, 1985; King *et al.*, 1995). This study showed that land use change could increase  
258 soil erodibility more than 50 times and decrease boundary shear stress about 6 fold. This  
259 meant that the effect of land use change on  $K_r$  was more significant than on  $\tau_{cr}$ . Similar results  
260 have been reported by other researchers (Nagchtargle and Poeson, 2002; Knapen *et al.*, 2007),  
261 who found that using the conventional K in the USLE cannot reflect the spatial variations of  
262 erodibility in a landscape scale. With the same soil attributes, both the vegetation cover and  
263 the micro relief of the ground surface are the main factors determining the spatial variation of  
264 detachment and sedimentation along the flume (Bergsma and Farshand, 2004), preventing the  
265 establishment of a stable and uniform erosion pattern. To assess and model erosion over a  
266 landscape, a simple sediment transport equation does not give a precise result regarding  
267 detachment and sedimentation (Morgan, 2005; Adelpour, 2004). Therefore, the adoption of a  
268 large range of  $K_r$  values is essential to improve physically based erosion models.

269 It was noticeable that  $K_r$  of the abandoned land and rangeland were similar in low runoff  
270 depth (run 1 and 2 in Table 2). However,  $K_r$  of the abandoned land in high run-off depth (run  
271 3 in Table 2) was different from that of the rangeland, while it was similar to that of the dry  
272 farming land. Such behaviour indicated that for a given soil, a change of land use affected the  
273 run-off erosion process for several years. The value of  $\tau_{cr}$  for head cut initiation on the  
274 rangeland is five times higher than that in dry farming land, implying that high surface and  
275 subsurface (10 cm) aggregate resistance in the rangeland was probably a result of the  
276 biological crust.

277 The mean  $\tau_{cr}$  for the whole dataset of this research was 134 dyne/cm<sup>2</sup>, which was lower than  
278 the global average value of 150 dyne/cm<sup>2</sup> (Knapen *et al.*, 2007). The main reason for this

279 difference could be the discrepancy of ground features and the use of a sandy loam soil. The  
280 large differences between  $\tau_{cr}$  in this research and the result (mean of 7.45 dyne/cm<sup>2</sup>) obtained  
281 by EGEM's formula (Tekwa et al., 2015) implied that the application of EGEM formula to  
282 predicting of gully head cut initiation and gully sediment yield cannot be satisfactory.  
283 Previous research (Nachtargale, 2001) held the similar opinion. The main reasons could be  
284 the inverse relation of erodibility to  $\tau_{cr}$ , and the use of a simple soil attribute (clay content) for  
285 estimation of threshold shear stress in EGEM.

286 The relationships between the numbers of observed head cuts and shear stress in the  
287 abandoned area and rangeland were the same when  $\tau_{cr} < 140$  dyne/cm<sup>2</sup>. However, in  
288 abandoned land, as the  $\tau_{cr}$  increased, the observed number of head cuts increased by a factor  
289 of three (Table 2). This was because land use not only affected the resistance of the surface  
290 soil but also affected the resistance of the sub-soil. After seven years of abandonment, the  
291 erodibility of sub-soil had not changed significantly. Even though no tillage operations had  
292 been conducted on the abandoned land for seven years, the sub-soil had not or even could not  
293 return to its original condition and level of resistance.

294 In most physically based and process based models,  $D_r$  is dominated by the shear stress.  
295 The regression results of detachment rate ( $D_r$ ) in this study showed that close relations  
296 between  $D_r$  and  $\omega_u$  existed not only in head cut erosion but also in surface and inter-rill  
297 erosion. Such validity and generality of power concept for erosion modelling could be related  
298 to the fact that all of stream power indices have been derived from the basic concepts of  
299 fluid mechanics (Yang, 1996). Many other researches (in situ and in vitro) have also  
300 showed that stream power is better than other parameters. Although the hydraulic and  
301 erodibility values in this study were within the range of the reported values by the previous  
302 researches (Nearing et al., 1999; Knapen et al., 2007; Zhang et al., 2014), the erodibility and  
303 threshold values of unit stream power had not been confirm by the WEPP, EUROSEM and

304 EGEM models (Zhang et al., 2003; Zhang et al., 2014; Tekwa et al., 2015). Together with  
305 previous findings (Zhang et al., 2014; Zhang et al., 2003), it is claimed that more efforts  
306 should be taken to further investigate the mechanisms of soil erosion and improve  
307 erosion models.

## 308 **5 Conclusions**

309 Experimental results of detachment and head cut initiation indicated that critical shear stress  
310 ( $\tau_{cr}$ ), soil resistance to concentrated flow ( $K_r$ ) and head cut initiation were dependent on land  
311 use and soil surface conditions. Critical shear stress has been the most widely used parameter  
312 for physically-based models. This study showed that most physically based models should  
313 use a wider range of both  $K_r$  and  $\tau_{cr}$  values. In other words, the use of a single value of  $\tau_{cr}=35$   
314 dyne/cm<sup>2</sup> or  $\omega_u=0.4$  Cm/S as the threshold hydraulic parameters cannot accurately represent  
315 the threshold condition for gully initiation. In addition, the duration of farming land  
316 abandonment should be taken into consideration in order to obtain a realistic value for  $K_r$ .  
317 This study also indicated that more efforts should be taken to obtain a closer insight on the  
318 soil erosion mechanisms and erosion modelling. In many physically based and process based  
319 models,  $D_r$  is dominated by the shear stress; however, the findings of this research revealed  
320 that the unit stream power showed stronger correlation to detachment rate. Therefore, new  
321 approach based on stream power concept should be considered when developing a  
322 process-based model for gully head cut erosion.

## 323 **Acknowledgements**

324 This research was supported by the Centre of Excellence for Sustainable Watershed  
325 Management of the University of Tehran and National Nature Science Foundation of China  
326 (51425902). We appreciate Dr. Catherine Rice, PhD from Purdue University, USA for  
327 proofreading the English. The authors would like to thanks of anonymous reviewers for their  
328 valuable and helpful comments.

329 **References**

- 330 Adelpour, A.A., 2004. An investigation and hydrological thresholds of channel  
331 erosion in different landuse with loamy-sand soil. PhD dissertation. Shahid  
332 Chamran University of Ahvaz, (in Persian).
- 333 Bergesma, E., Farshad. A., 2007. Monitoring erosion using micro topographic  
334 features. In: Graaff, J.d., Cameron, J., Sombatpanit, S., Pieri, Ch., Woodhill J.,  
335 (Eds), Monitoring and evaluation of Soil Conservation and Watershed  
336 Development Projects, Scinece Publishers, India, pp. 249-266.
- 337 Begin, Z.B., Schumm, S.A., 1979. Instability of alluvial valley floors: a method for its  
338 assessment. *Transaction of the ASAE* 22, 347–350.
- 339 Brice, J.B., 1966. Erosion and deposition in the loess-mantled Great Plains, medicine  
340 creek drainage basin. U.S. Geological Survey Professional Paper 352H, 235– 339.
- 341 Conforti, M., Aucelli, P. P. C., Robustelli, G., Scarciglia, F. 2011. Geomorphology  
342 and GIS analysis for mapping gully erosion susceptibility in the Turbolo stream  
343 catchment (Northern Calabria, Italy). *Natural Hazards*, 56, 881–898.
- 344 Eldridge, D.J., 2003. Biological soil crust and water relation in Australian desrts. In:  
345 Belnap, J., Lange, O.L., (Eds.), *Biological soil crusts: structure. function and*  
346 *management*. Springer, pp. 315-325.
- 347 Eldridge, D.J., Kinnel, P.I.A., 1997. Assessment of erosion rates from  
348 microphyte-dominated calcareous soils under rain-impacted flow, *Australian*  
349 *Journal of Soil Research* 35, 475-489
- 350 Foster, G.R., 1982. Modeling the erosion process. In: Hahn C.T., (Ed.), *Hydrologic*  
351 *Modeling of Small Watersheds*. American Society of Agricultural Engineering,  
352 Michigan, USA, pp. 295–380.
- 353 Franti, T.G., Laflen, J.M., Watson. D.A., 1999. Predicting soil detachment from high

354 discharge concentrated flow. *Transactions of the ASAE* 42 (2), 329–335.

355 Govers, G., 1985. Selectivity and transport capacity of thin flow in relation to rill  
356 erosion. *Catena* 12, 35–49.

357 Hauge, C., 1977. Soil erosion definitions. *California Geology* 30, 202–203.

358 Imeson, A.C., Kwaad. F.J.P.M., 1980. Gully types and gully prediction. *KNAG*  
359 *Geografisch Tijdschrift* XIV 5, 430–441.

360 King, K.W., Flanagan, D.C., Norton, L.D., Laflen, J.M., 1995. Rill erodibility  
361 parameters influenced by long-term management practices. *Transactions of the*  
362 *ASAE* 38 (1), 159–164.

363 Knapen, A., Poesen, J., Govers, G., Gyssels, G., Nachtergaele, J., 2007. Resistance of  
364 soils to concentrated flow erosion: A review. *Earth-Science Reviews* 80, 75–109.

365 Léonard, J., Richard, G., 2004. Estimation of runoff critical shear stress for soil  
366 erosion from soil shears strength. *Catena* 57(3), 233-249.

367 Li, Y., Poesen, J., Yang, J.C., Fu, B., Zhang, J.H., 2003. Evaluating gully erosion  
368 using  $^{137}\text{Cs}$  and  $^{210}\text{Pb}/^{137}\text{Cs}$  ratio in a reservoir catchment. *Soil & Tillage*  
369 *Research* 69, 107–115

370 Lo'pez, E., Bocco, G., Mendoza, M., Vela'zquez, A., Aguirre-Rivera, J.R., 2006.  
371 Peasant emigration and land-use change at the watershed level: A GIS-based  
372 approach in Central Mexico. *Agricultural Systems* 90, 62-78.

373 Morgan, R.P.C., 2005. *Soil erosion and conservation*. Third ed. Blackwell, UK.

374 Nachtergaele, J., Poesen, J., 2002. Spatial and temporal variations in resistance of  
375 loess-derived soils to ephemeral gully erosion. *European Journal of Soil Science*  
376 53, 449–463.

377 Nachtergaele, J., Poesen, J., Vandekerckhove, L., Oostwoud Wijdenes, D., Roxo,  
378 M., 2001. Testing the Ephemeral Gully Erosion Model (EGEM) for two



379 Mediterranean environments. *Earth Surface Processes Landforms*. 26(1): 17–30.

380 Nazari Samani A, Ahmadi H, Jafari M, Guy B, Ghoddousi J, and Malekian A (2009)

381 Geomorphic threshold conditions for gully erosion in southwestern Iran

382 (Boushehr-Samal watershed). *Journal of Asian Earth Sciences* 35: 180–189.

383 Nazari Samani, A., Wasson, R.J., Malekian. A., 2011. Application of multiple

384 sediment fingerprinting techniques to determine the sediment source contribution

385 of gully erosion: Review and case study from Boushehr province, south-western

386 Iran. *Progress in Physical Geography* 35(3), 375–391.

387 Nearing, M.A., Simanton, J.R., Norton, L.D., Bulygin, S.J., Stone. J., 1999. Soil

388 erosion by surface water flow on a stony, semiarid hill- slope. *Earth Surface*

389 *Processes Landforms*. 24: 677–686.

390 Poesen, J., Nachtergaele, J., Verstraeten, G., Valentin, C., 2003. Gully erosion and

391 environment change: importance and research needs. *Catena* 50, 91-133.

392 Prosser, I.P., Slade, J., 1994. Gully formation and the role of valley-floor vegetation.

393 *Geology* 22, 1127-1136.

394 Prosser, I.P., Dietrich, W.E., Stevenson, J., 1995. Flow resistance and sediment

395 transport by concentrated overland flow in a grassland valley. *Geomorphology* 13,

396 73–86.

397 Rouse, H. 1961. *Fluid mechanics hydraulic engineering*. Dover, New Yourk.

398 Savat, J., De Ploey, J., 1982. Sheetwash and rill development by surface flow. In:

399 Bryan, R.B., Yair A., (Eds.), *Badland Geomorphology and Piping*. GeoBooks,

400 Norwich, pp. 113–126.

401 Slattery, M.C., Bryan, R.B., 1992. Hydraulic conditions for rill incision under

402 simulated rainfall. A laboratory experiment, *Earth Surface Processes and*

403 *Landforms* 17, 127–146.

404 Tekwa, I.J., Laflen, J.M., Kundiri, A.M., 2015. Efficiency test of adapted EGEM  
405 model in predicting ephemeral gully erosion around Mubi, Northeast Nigeria.  
406 International Soil and Water Conservation Research 3, 15–27

407 Thonon, I., 1999. Thresholds for incipient rilling and particle entrainment. Faculty of  
408 Geographical Sciences, Utrecht University.

409 Torri, D., Dfalanga, M., Chisci, G., 1987. Threshold conditions for incipient rilling.  
410 Catena Supplement 8, 97–105.

411 Vandekerckhove, L., Poesen, J., Oostwoud Wijdenes, D., Nachtergaele, J., Kosmas,  
412 C., Roxo, M.J., Figueiredo, T.D.E., 2000. Thresholds for gully initiation and  
413 sedimentation in Mediterranean Europe. Earth Surface Processes and Landforms  
414 25, 1201–1220.

415 Wasson R.J, Olive, L.J., Rosewell, C.J., 1996. Rates of erosion and sediment transport  
416 in Australia. IAHS Publications 236, 139– 148.

417 West, L.T., Miller, W.P., Bruce, R.R., Langdale, G.W., Laflen, J.M., Thomas, A.W.,  
418 1992. Cropping system and consolidation effects on rill erosion in the Georgia  
419 Piedmont. Soil Science Society of America Journal, 56, 1238–1243.

420 Yalin, M.S., 1977. Mechanics of Sediment Transport. Pergamon Press, Oxford, 298  
421 pp.

422 Yang, C.T., 1996. Sediment Transport, Theory and practices. McGraw Hill., New  
423 York, 396 pp.

424 Zhang, G., Liu, B., Liu, G., He, X., Nearing, M.A., 2003. Detachment of undisturbed  
425 soil by shallow flow. Soil Science Society of America Journal, 67, 713 – 719.

426 Zhang, Q., Dong, Y., Li, F., Zhang, A., Lei, T., 2014. Quantifying detachment rate of  
427 eroding rill or ephemeral gully for WEPP with flume experiments. Journal of  
428 Hydrology, 519, 2012–2019.

430 Table 1: Soil attributes of three land uses selected for experiments

| Land use    | Texture    | Silt (%) | Ec (ds/m) | OC (%) | Lime (%) | Na (meq/lit) | Ca (meq/lit) | SAR | pH  | Cl (meq/lit) | Ground slope (%) |
|-------------|------------|----------|-----------|--------|----------|--------------|--------------|-----|-----|--------------|------------------|
| Rangeland   | Sandy loam | 8        | 3.74      | 0.44   | 23.30    | 33           | 18.4         | 7.8 | 7.3 | 15.6         | 5.9              |
| Dry farming | Sandy loam | 5.5      | 3.44      | 0.85   | 23.75    | 34           | 15           | 8.1 | 7.3 | 16.4         | 0.13             |
| Abandoned   | Sandy loam | 5        | 3.34      | 0.50   | 21.25    | 29.5         | 14           | 7   | 7.3 | 14.7         | 4.4              |

431 Table 2 Shear stress for different runs with observed head cuts for each land use  
 432 (1Pa=10 dyne/cm<sup>2</sup>).

433

| Land use            | Run | Mean shear stress<br>along the flume<br>(dyne/cm <sup>2</sup> ) | Number of<br>head cuts | Critical shear stress for head cut<br>initiation (dyne/cm <sup>2</sup> ) |
|---------------------|-----|-----------------------------------------------------------------|------------------------|--------------------------------------------------------------------------|
| Rangelands          | 1   | 70                                                              |                        |                                                                          |
|                     | 2   | 106                                                             |                        |                                                                          |
|                     | 3   | 146                                                             | 1                      | 174                                                                      |
|                     | 4   | 178                                                             | 2                      |                                                                          |
| Dry farming<br>land | 1   | 5                                                               | -                      |                                                                          |
|                     | 2   | 9                                                               | -                      |                                                                          |
|                     | 3   | 15                                                              | -                      |                                                                          |
|                     | 4   | 19                                                              | -                      | 35                                                                       |
|                     | 5   | 34                                                              | 2                      |                                                                          |
|                     | 6   | 40                                                              | 4                      |                                                                          |
|                     | 7   | 42                                                              | 5                      |                                                                          |
| Abandoned<br>areas  | 1   | 78                                                              |                        |                                                                          |
|                     | 2   | 115                                                             |                        |                                                                          |
|                     | 3   | 161                                                             | 3                      | 153                                                                      |
|                     | 4   | 178                                                             | 5                      |                                                                          |
|                     | 5   | 217                                                             | 8                      |                                                                          |

## Figures

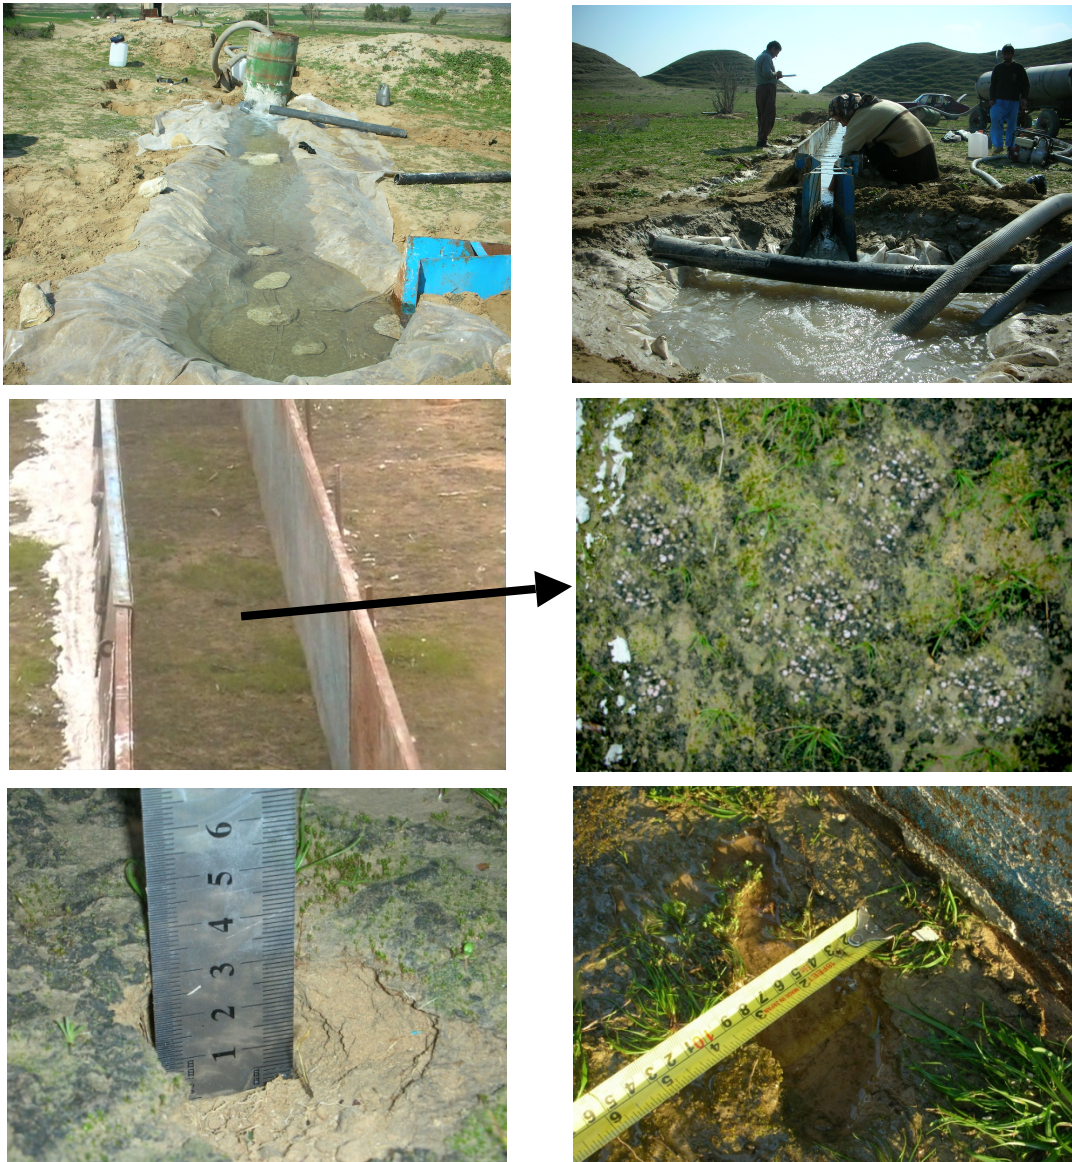

435 Fig. 1- Flume, water supply, retention pond, overflow pipe and Parshall Flume (Top  
 436 photos); flume surface and vegetation (grass and pale pink lichen patch) in the  
 437 rangeland (middle photos); sample of initiated head cut with height of 3 cm in range  
 438 land (bottom left) and abandoned land (bottom right).

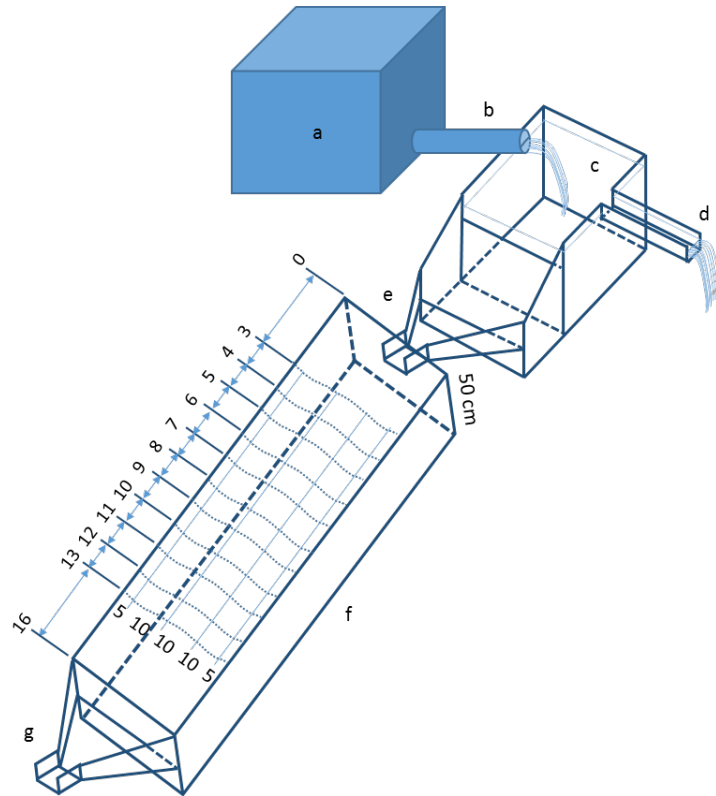

439

440 Fig. 2 Schematic of experimental flume. a) Main water supply; b) Input of stilling  
 441 pond; c) Small retention pond; d) Overflow spillway for constant levelling; e) Inlet  
 442 Parshall flume; f) Mid-section mesh used to measure flow depth and ground elevation;  
 443 g) Outlet Parshall flume.

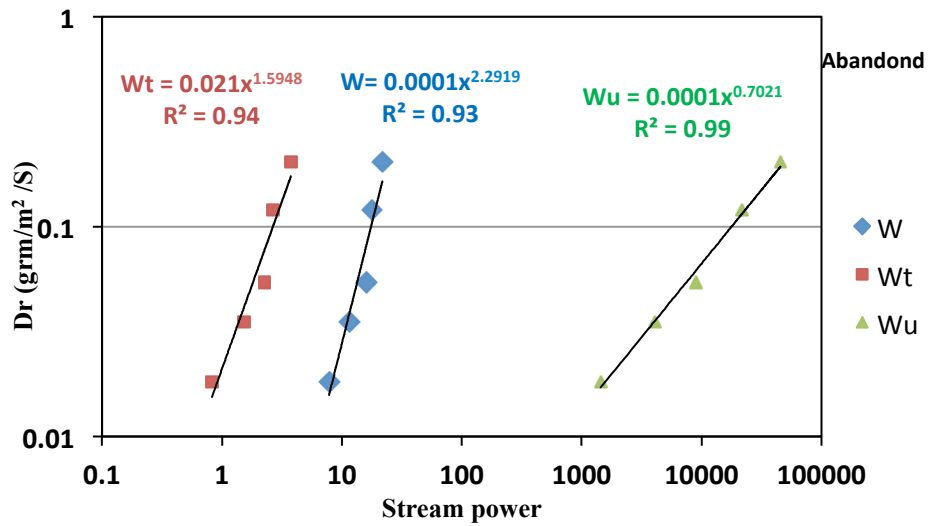

444

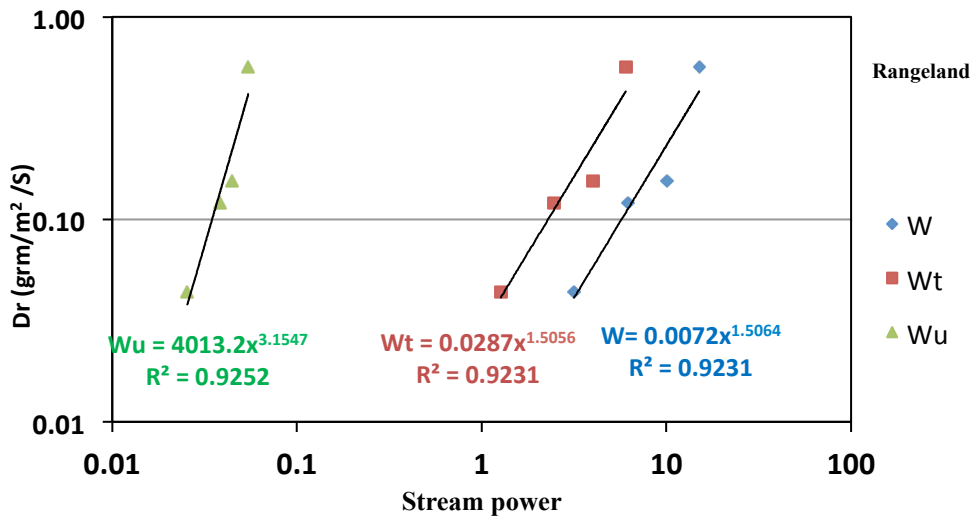

445

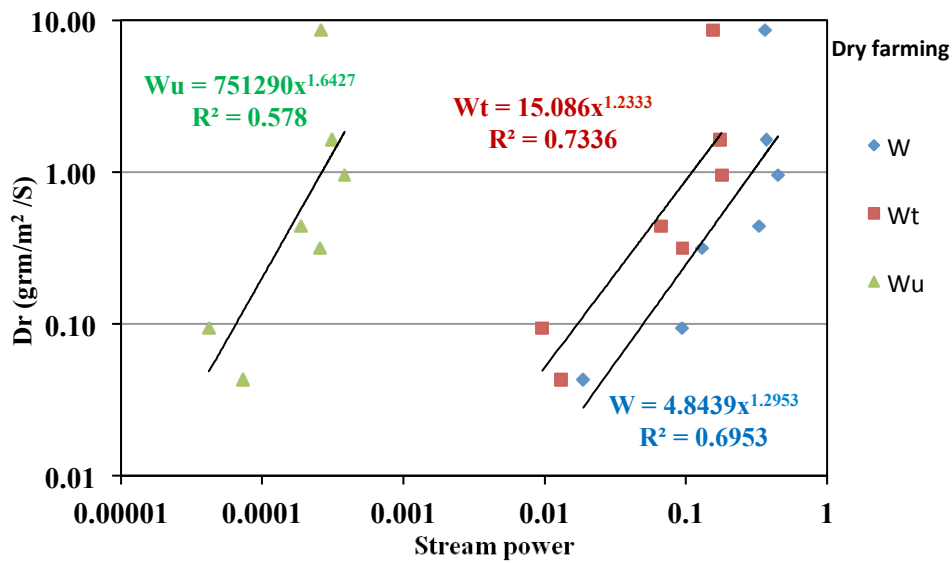

446

447 Fig. 3: Relationship between stream power indices and detachment rate in different

448 land use ( $P < 0.001$ ).

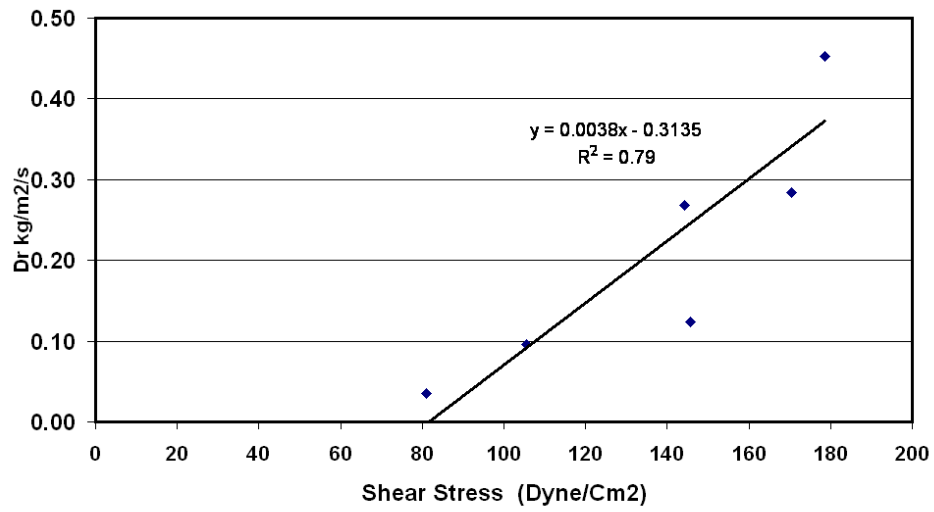

449

450 Fig. 4 Relationship between shear stress ( $\tau$ ) and detachment rate in the rangeland

451 ( $P < 0.01$ )



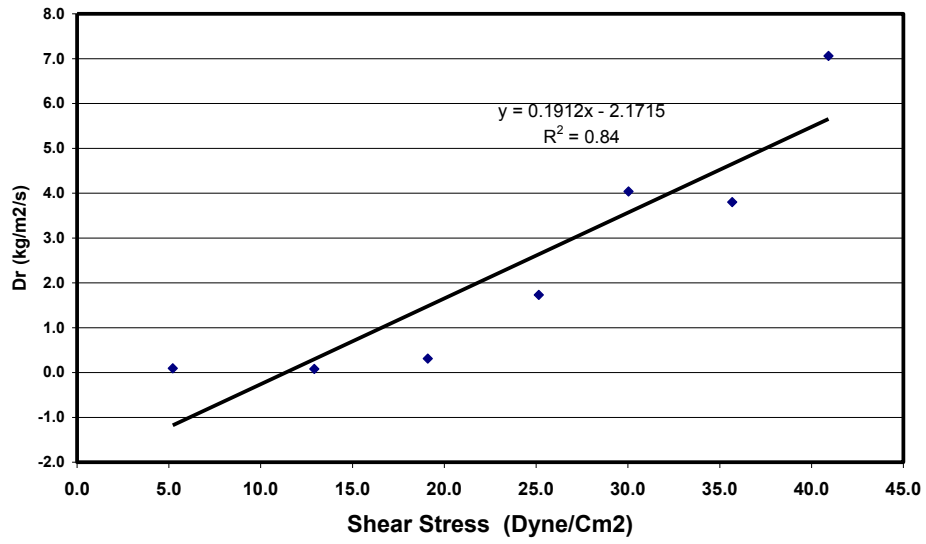

452

453 Fig. 5 Relationship between shear stress ( $\tau$ ) and detachment rate in dry farming land

454 ( $P < 0.05$ )

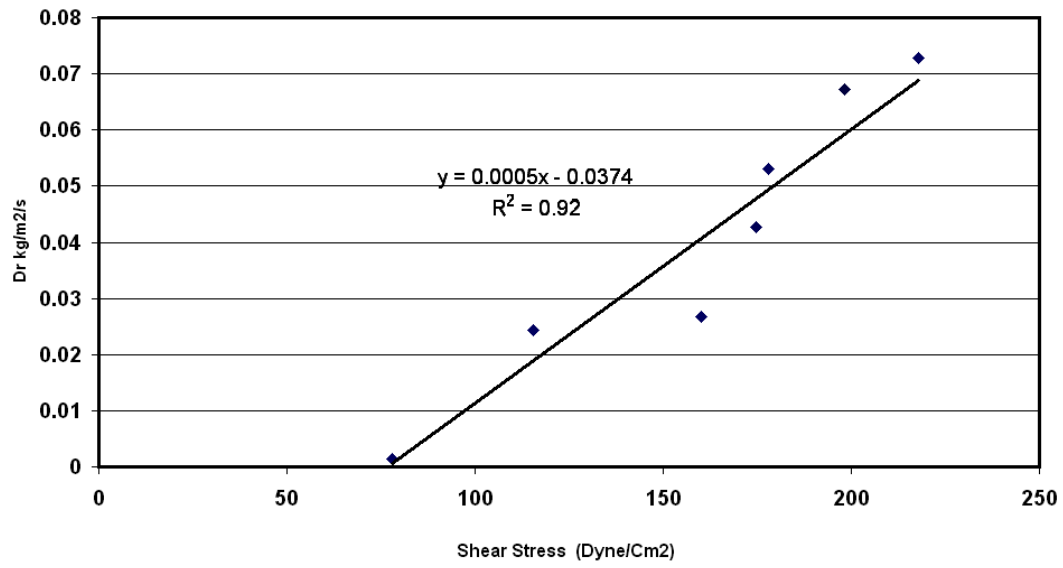

455

456 Fig. 6. Relationship between shear stress ( $\tau$ ) and detachment rate in abandoned land

457 ( $P < 0.001$ )
